# Supplementary material
Source: PubMed Central journal article supplement (PMC6451574)
Supplement: ejhpharm-2015-000872supp001.pdf [file ejhpharm-2015-000872supp001.pdf]

**Supplementary tables (1): Implementation of mandatory requirements, standards and the best practice recommendations of Institute for Safe Medication Practices (ISMP) for sterile preparations compounding**

| <b>Mandatory requirements that should be established by law or regulations</b>                                                             | <b>Implemented<br/>N (%)</b> | <b>Not implemented<br/>N (%)</b> | <b>I do not know<br/>N (%)</b> |
|--------------------------------------------------------------------------------------------------------------------------------------------|------------------------------|----------------------------------|--------------------------------|
| Written policies and procedures that guide the compounding of sterile preparations exist.                                                  | 37 (94.9%)                   | 2 (5.1%)                         | 0                              |
| All orders entered into a pharmacy system are verified by a pharmacist prior to medication administration, except in emergency situations. | 29 (74.4%)                   | 10 (25.6%)                       | 0                              |

| <b>Minimum Safety Standards</b>                                                                                                                 | <b>Implemented<br/>N (%)</b> | <b>Not implemented<br/>N (%)</b> | <b>I do not know<br/>N (%)</b> |
|-------------------------------------------------------------------------------------------------------------------------------------------------|------------------------------|----------------------------------|--------------------------------|
| Chemotherapy, parenteral nutrition (PN), and other selected high-alert medications orders are verified by a second pharmacist.                  | 30 (76.9%)                   | 9 (23.1%)                        | 0                              |
| Concentrated (undiluted) electrolytes are removed from all patient care areas, and they are not available outside the pharmacy for any reason.  | 28 (71.8%)                   | 8 (20.5%)                        | 3 (7.7%)                       |
| Labeled red box are used to stock all concentrated (undiluted) electrolytes in pharmacy and clearly identified as High-Alert Medications.       | 30 (76.9%)                   | 7 (18%)                          | 2 (5.1%)                       |
| All compounded parenteral products are prepared in pharmacy.                                                                                    | 28 (71.8%)                   | 11 (28.2%)                       | 0                              |
| Standard base solutions (e.g., dextrose 5%) are used for preparing compounded sterile products.                                                 | 31 (79.5%)                   | 3 (7.7%)                         | 5 (12.8%)                      |
| Formulas are established and standardized to guide the compounding of complex sterile preparations, such as cardioplegia or dialysis solutions. | 30 (76.9%)                   | 7 (18%)                          | 2 (5.1%)                       |
| Only one staff member is permitted to work in the compounding area during compounding chemotherapy and complex sterile preparations.            | 23 (59%)                     | 12 (30.8%)                       | 4 (10.2%)                      |
| Two staff members are permitted to work in the compounding area if the products being compounded are non-chemotherapy.                          | 29 (74.4%)                   | 5 (12.8%)                        | 5 (12.8%)                      |
| Computerized label runs for pediatric and neonatal parenteral preparations are printed separately from adult parenteral preparations.           | 24 (61.5%)                   | 14 (35.9%)                       | 1 (2.6%)                       |
| The preparation of intravenous products for each population is separated by time, location, or use of different color bins.                     | 15(38.5%)                    | 21(53.8%)                        | 3(7.7%)                        |
| Drugs, diluents, and base solutions are placed in a separate container (e.g., a basket or bin) for each batch to be prepared.                   | 30 (77%)                     | 9 (23%)                          | 0                              |
| No two drugs are in the same hood at the same time.                                                                                             | 23 (58.9%)                   | 15 (38.5 %)                      | 1 (2.6%)                       |

|                                                                                                                                                                                          |            |            |          |
|------------------------------------------------------------------------------------------------------------------------------------------------------------------------------------------|------------|------------|----------|
| All compounding staff pharmacists are certified and passed the competency evaluation for all aspects of sterile compounding (e.g., aseptic technique practical test, calculations, etc.) | 29 (74.4%) | 10 (25.6%) | 0        |
| A visual check is conducted to all diluents and drugs, including volumes and concentrations, prior to addition to the final container.                                                   | 33 (84.6%) | 5 (12.8%)  | 1 (2.6%) |
| For all sterile preparations, the final volume (e.g., bag volume plus additive volume) to be infused is present on the label.                                                            | 31 (79.5%) | 7 (17.9%)  | 1 (2.6%) |

| <b>Best Practice Recommendations</b>                                                                                                                                           | <b>Implemented<br/>N (%)</b> | <b>Not implemented<br/>N (%)</b> | <b>I do not know<br/>N (%)</b> |
|--------------------------------------------------------------------------------------------------------------------------------------------------------------------------------|------------------------------|----------------------------------|--------------------------------|
| A drug conservation policy that addresses the handling and disposition of drugs that may be in short supply because of market conditions.                                      | 26 (66.7%)                   | 11 (28.2%)                       | 2 (5.1%)                       |
| Sufficient space for drug storage is provided to segregate each drug concentration and look-alike/sound-alike medications.                                                     | 35 (89.7%)                   | 3 (7.7%)                         | 1(2.6%)                        |
| Labeling of bins includes generic drug name and concentration.                                                                                                                 | 34 (87.2%)                   | 5 (12.8%)                        | 0                              |
| Labeling of bins includes brand name for combination products, for example, Seprin (trimethoprim/sulfamethoxazole).                                                            | 28 (71.8%)                   | 11 (28.2%)                       | 0                              |
| Tall man lettering is employed for look-alike drug names and is incorporated into computerized prescriber order entry (CPOE), pharmacy information systems and product labels. | 22 (56.4%)                   | 14 (35.9%)                       | 3 (7.7%)                       |
| When available, commercially premixed parenteral products are used over manually compounded sterile products.                                                                  | 27 (69.2%)                   | 11 (28.2%)                       | 1 (2.6%)                       |
| Standard operating procedures (SOPs) for compounding all parenteral preparations including ophthalmic solutions compounding are updated.                                       | 30 (77%)                     | 7 (17.9%)                        | 2 (5.1%)                       |
| Only one parenteral preparation is prepared at a time, except if preparing the same doses of the same drug with the same route of administration.                              | 33 (84.6%)                   | 6 (15.4%)                        | 0                              |
| Partially used multi-dose vials, bulk containers, or single-dose containers are not left in the hood for future use.                                                           | 29 (74.4%)                   | 8(20.5%)                         | 2 (5.1%)                       |
| The organization has a strategic plan for implementation of automation and technology, such as bar code verification or intravenous robotics for the sterile products service. | 23 (59%)                     | 14 (35.9%)                       | 2 (5.1%)                       |
| Technology and automation are utilized as much as possible for preparing and verifying parenteral preparations.                                                                | 12 (30.8%)                   | 27 (69.2%)                       | 0                              |
| Intravenous workflow software (e.g., DoseEdge, ScriptPro Telepharmacy, and Intravenous Soft or similar technology) is used.                                                    | 13 (33.3%)                   | 25 (64.1%)                       | 1 (2.6%)                       |
| Information about medication errors, from sources such as Institute for Safe Medication Practices (ISMP), are reviewed and used to modify practices and procedures as needed.  | 33 (84.6%)                   | 5 (12.8%)                        | 1 (2.6%)                       |

|                                                                                                                                                                    |            |            |           |
|--------------------------------------------------------------------------------------------------------------------------------------------------------------------|------------|------------|-----------|
| Errors that occur during the compounding of parenteral preparations, including near misses, are reported through the organization's reporting system for analysis. | 31 (79.5%) | 8 (20.5%)  | 0         |
| Bold patient name, generic drug name, and patient specific dose on all labels.                                                                                     | 23 (58.9%) | 12 (30.8%) | 4 (10.3%) |
| Yellow labels are usually utilized for epidurals and high-alert drugs (e.g., chemotherapeutic agents).                                                             | 23 (58.9%) | 15 (38.5%) | 1 (2.6%)  |
| All potentially dangerous abbreviations for drug names, dosing units, routes of administration, and frequencies are not used.                                      | 35 (89.7%) | 4 (10.3%)  | 0         |
| Records used for preparing batch parenteral preparations are kept.                                                                                                 | 31 (79.5%) | 7 (17.9%)  | 1 (2.6%)  |
