# Supplementary material
Source: PubMed Central journal article supplement (PMC6451574)
Supplement: ejhpharm-2015-000872supp002.pdf [file ejhpharm-2015-000872supp002.pdf]

**Supplementary table (2): Implementation of mandatory requirements, standards and the best practice recommendations of Institute for Safe Medication Practices (ISMP) for sterile preparations compounding by country**

| <b>Mandatory requirements, standards and the best practice recommendations ISMP for sterile preparations compounding</b>                        | <b>Saudi Arabia</b>      | <b>United States of America</b> | <b>United Arab of Emirates</b> | <b>Bahrain</b> | <b>Kuwait</b> | <b>Egypt</b> | <b>Malta</b> |
|-------------------------------------------------------------------------------------------------------------------------------------------------|--------------------------|---------------------------------|--------------------------------|----------------|---------------|--------------|--------------|
| <b>Mandatory requirements</b>                                                                                                                   | <b>Implemented N (%)</b> |                                 |                                |                |               |              |              |
| Written policies and procedures that guide the compounding of sterile preparations exist.                                                       | 26(96.3)                 | 2(100)                          | 5(83.3)                        | 1(100)         | 1(100)        | 1(100)       | 1(100)       |
| All orders entered into a pharmacy system are verified by a pharmacist prior to medication administration, except in emergency situations.      | 22(81.5)                 | 2(100)                          | 4(66.7)                        | 0(0)           | 0(0)          | 0(0)         | 1(100)       |
| <b>Minimum safety standards</b>                                                                                                                 | <b>Implemented N (%)</b> |                                 |                                |                |               |              |              |
| Chemotherapy, parenteral nutrition (PN), and other selected high-alert medications orders are verified by a second pharmacist.                  | 22(81.5)                 | 1(50)                           | 5(83.3)                        | 0(0)           | 1(100)        | 1(100)       | 0(0)         |
| Concentrated (undiluted) electrolytes are removed from all patient care areas and they are not available outside the pharmacy for any reason.   | 19(70.4)                 | 2(100)                          | 6(100)                         | 0(0)           | 0(0)          | 0(0)         | 1(100)       |
| Labeled red box are used to stock all concentrated (undiluted) electrolytes in pharmacy, and clearly identified as High Alert Medications.      | 21(77.8)                 | 1(50)                           | 6(100)                         | 1(100)         | 1(100)        | 0(0)         | 0(0)         |
| All compounded parenteral products are prepared in pharmacy.                                                                                    | 19(70.4)                 | 2(100)                          | 4(66.7)                        | 0(0)           | 1(100)        | 1(100)       | 1(100)       |
| Standard base solutions (e.g., dextrose 5%) are used for preparing compounded sterile products.                                                 | 22(81.5)                 | 2(100)                          | 5(83.3)                        | 1(100)         | 0(0)          | 1(100)       | 0(0)         |
| Formulas are established and standardized to guide the compounding of complex sterile preparations, such as cardioplegia or dialysis solutions. | 22(81.5)                 | 2(100)                          | 4(66.7)                        | 1(100)         | 0(0)          | 1(100)       | 0(0)         |
| Only one staff member is permitted to work in the compounding area when compounding chemotherapy and complex sterile preparations.              | 14(51.2)                 | 2(100)                          | 5(83.3)                        | 1(100)         | 0(0)          | 1(100)       | 0(0)         |

|                                                                                                                                                                                          |                          |        |         |        |        |        |        |
|------------------------------------------------------------------------------------------------------------------------------------------------------------------------------------------|--------------------------|--------|---------|--------|--------|--------|--------|
| Two staff members are permitted to work in the compounding area if the products being compounded are non-chemotherapy.                                                                   | 20(74.1)                 | 1(50)  | 4(66.7) | 1(100) | 1(100) | 1(100) | 1(100) |
| Computerized label runs for pediatric and neonatal parenteral preparations are printed separately from adult parenteral preparations.                                                    | 18(66.7)                 | 1(50)  | 3(50)   | 1(100) | 0(0)   | 0(0)   | 1(100) |
| The preparation of intravenous products for each population is separated by time, location, or use of different color bins.                                                              | 12(44.4)                 | 1(50)  | 2(33.3) | 0(0)   | 0(0)   | 0(0)   | 0(0)   |
| Drugs, diluents, and base solutions are gathered and placed in a separate container, (e.g., a basket or bin) for each batch to be prepared.                                              | 23(85.2)                 | 2(100) | 3(50)   | 1(100) | 0(0)   | 1(100) | 0(0)   |
| No two drugs are in the same hood at the same time.                                                                                                                                      | 13(48.1)                 | 2(100) | 6(100)  | 1(100) | 0(0)   | 1(100) | 0(0)   |
| All compounding staff pharmacists are certified and passed the competency evaluation for all aspects of sterile compounding (e.g., aseptic technique practical test, calculations, etc.) | 21(77.8)                 | 2(100) | 4(66.7) | 0(0)   | 0(0)   | 1(100) | 1(100) |
| A visual check is conducted to all diluents and drugs including volumes and concentrations prior to addition to the final container.                                                     | 22(81.5)                 | 2(100) | 6(100)  | 1(100) | 0(0)   | 1(100) | 1(100) |
| For all sterile preparations, the final volume (e.g., bag volume plus additive volume) to be infused is present on the label.                                                            | 20(74.1)                 | 2(100) | 6(100)  | 1(100) | 0(0)   | 1(100) | 1(100) |
| <b>Best practice recommendations</b>                                                                                                                                                     | <b>Implemented N (%)</b> |        |         |        |        |        |        |
| A drug conservation policy that addresses the handling and disposition of drugs that may be in short supply because of market conditions.                                                | 18(66.7)                 | 2(100) | 5(83.3) | 0(0)   | 0(0)   | 0(0)   | 1(100) |
| Sufficient space for drug storage is provided to segregate each drug concentration and look-alike/sound-alike medications.                                                               | 24(88.9)                 | 2(100) | 6(100)  | 1(100) | 0(0)   | 1(100) | 1(100) |
| Labeling of bins includes generic drug name and concentration.                                                                                                                           | 25(92.6)                 | 1(50)  | 5(83.3) | 1(100) | 0(0)   | 1(100) | 1(100) |
| Labeling of bins includes brand name for combination products e.g., Septrin (Trimethoprim/Sulfamethoxazole).                                                                             | 20(74.1)                 | 1(50)  | 4(66.7) | 1(100) | 1(100) | 1(100) | 0(0)   |

|                                                                                                                                                                                |          |        |         |        |        |        |        |
|--------------------------------------------------------------------------------------------------------------------------------------------------------------------------------|----------|--------|---------|--------|--------|--------|--------|
| Tall Man Lettering is employed for look-alike drug names and is incorporated into computerized prescriber order entry (CPOE), pharmacy information systems and product labels. | 16(59.3) | 1(50)  | 4(66.7) | 0(0)   | 1(100) | 0(0)   | 0(0)   |
| When available, commercially premixed parenteral products are used over manually compounded sterile products.                                                                  | 17(62.3) | 2(100) | 6(100)  | 0(0)   | 0(0)   | 1(100) | 1(100) |
| Standard operating procedures (SOPs) for compounding all parenteral preparations including ophthalmic solutions compounding are updated.                                       | 22(81.5) | 2(100) | 6(100)  | 0(0)   | 0(0)   | 0(0)   | 0(0)   |
| Only one parenteral preparation is prepared at a time except if preparing the same doses of the same drug with the same route of administration .                              | 23(85.2) | 2(100) | 6(100)  | 1(100) | 0(0)   | 1(100) | 0(0)   |
| Partially used multi-dose vials, bulk containers or single dose containers are not left in the hood for future use.                                                            | 19(70.4) | 2(100) | 4(66.7) | 1(100) | 1(100) | 1(100) | 1(100) |
| The organization has a strategic plan for implementation of automation and technology such as bar code verification or intravenous robotics for the sterile products service.  | 18(66.7) | 2(100) | 3(50)   | 0(0)   | 0(0)   | 0(0)   | 0(0)   |
| Technology and automation are utilized as much as possible for preparing and verifying parenteral preparations.                                                                | 9(33.3)  | 1(50)  | 2(33.3) | 0(0)   | 0(0)   | 0(0)   | 0(0)   |
| Intravenous workflow software (e.g., DoseEdge, Script Pro Telepharmacy, and Intravenous Soft or similar technology) is used.                                                   | 9(33.3)  | 2(100) | 2(33.3) | 0(0)   | 0(0)   | 0(0)   | 0(0)   |
| Information about medication errors, from sources such as ISMP, are reviewed and used to modify practices and procedures as needed.                                            | 25(92.6) | 2(100) | 4(66.7) | 1(100) | 0(0)   | 1(100) | 0(0)   |
| Errors that occur during the compounding of parenteral preparations ,including near misses, are reported through the organization's reporting system for analysis.             | 23(85.2) | 2(100) | 4(66.7) | 1(100) | 0(0)   | 0(0)   | 1(100) |
| Bold patient name, generic drug name and patient specific dose on all labels.                                                                                                  | 16(59.3) | 2(100) | 3(100)  | 1(100) | 0(0)   | 1(100) | 0(0)   |
| Yellow labels are utilized for epidurals and high-alert drugs (e.g., chemotherapeutic agents).                                                                                 | 17(63)   | 1(50)  | 3(50)   | 0(0)   | 0(0)   | 1(100) | 1(100) |
| All potentially dangerous abbreviations for drug names, dosing units, routes of administration, and frequencies are not used.                                                  | 24(88.9) | 2(100) | 6(100)  | 1(100) | 0(0)   | 1(100) | 1(100) |

|                                                                     |          |        |         |      |      |      |        |
|---------------------------------------------------------------------|----------|--------|---------|------|------|------|--------|
| Records used for preparing batch parenteral preparations are kept . | 23(85.2) | 2(100) | 5(83.3) | 0(0) | 0(0) | 0(0) | 1(100) |
|---------------------------------------------------------------------|----------|--------|---------|------|------|------|--------|

\*Number of hospitals in Saudi Arabia (n=27), United States of America (n=2), United Arab of Emirates (n=6), Bahrain (n=1), Kuwait (n=1), Egypt (n=1) and Malta (n=1)
